# Supplementary material
Source: publisher figshare collection journal article supplement (https://tandf.figshare.com/articles/dataset/_/18857776)

(f) Onpremisedist v.s. Burglary

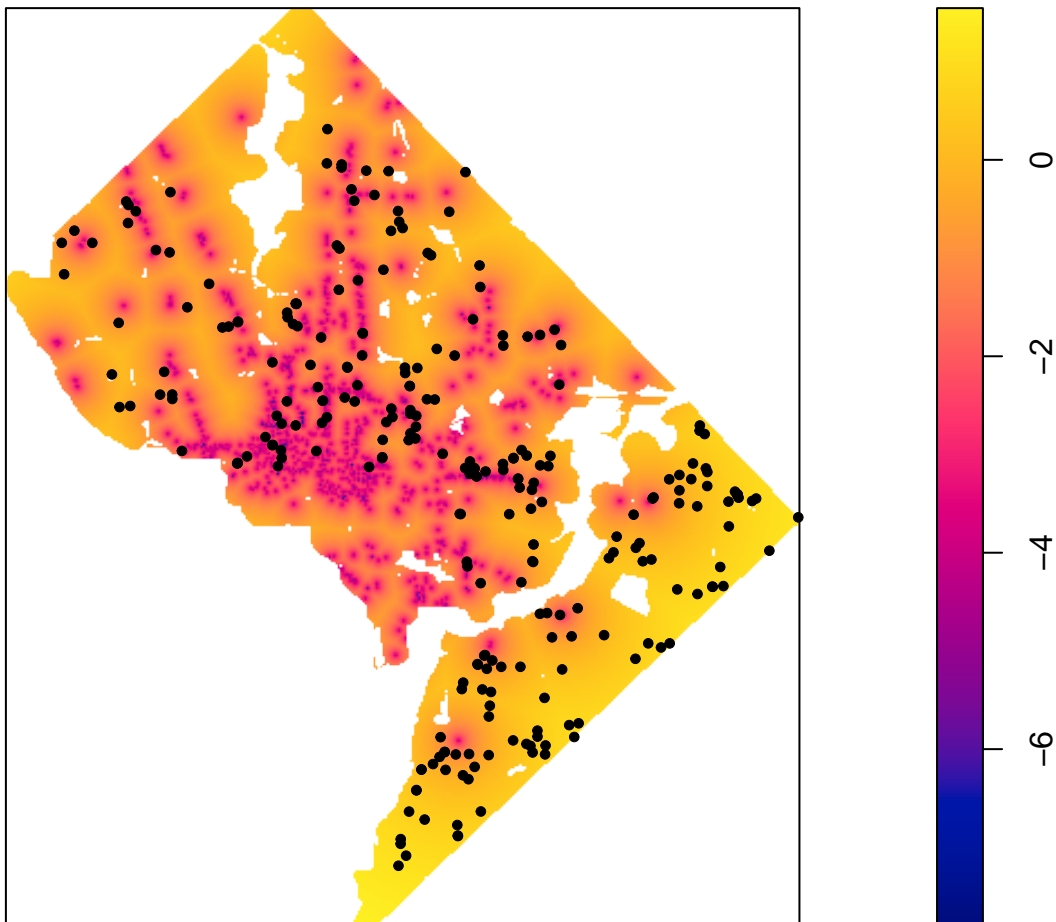

Supplement: Supplementary file 2 [file 1]

**(d) % of African American (census block level)**

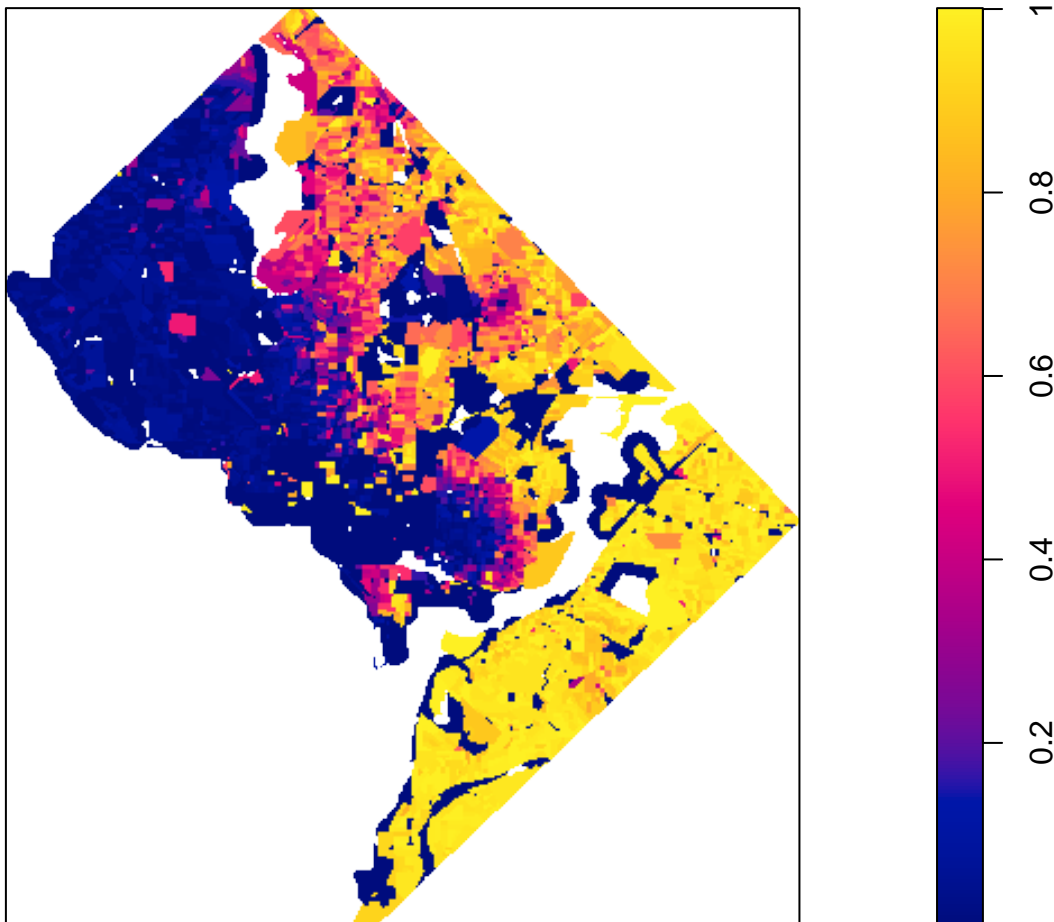

Supplement: Supplementary file 3 [file 1]

**(e) Grocerydist v.s. Burglary**

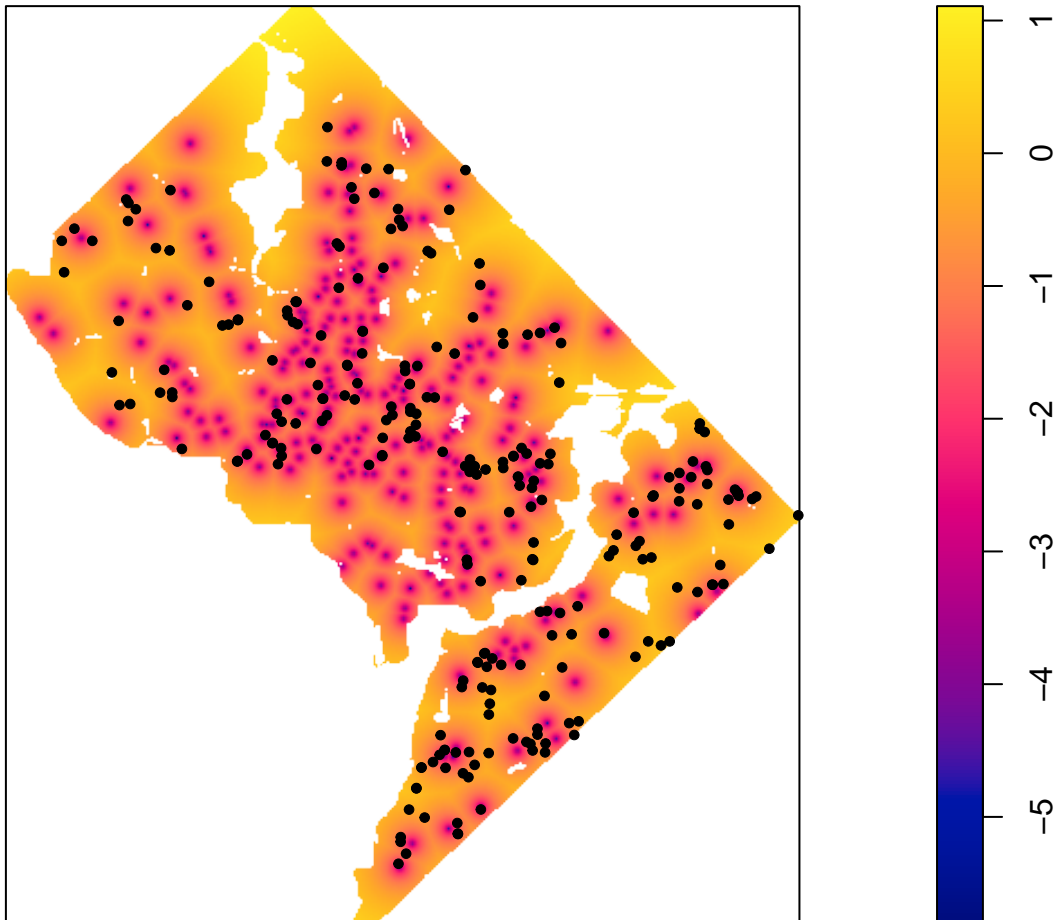

Supplement: Supplementary file 4 [file 1]

**(b) Differences of log-intensity (Assult, Improved-Reduced)**

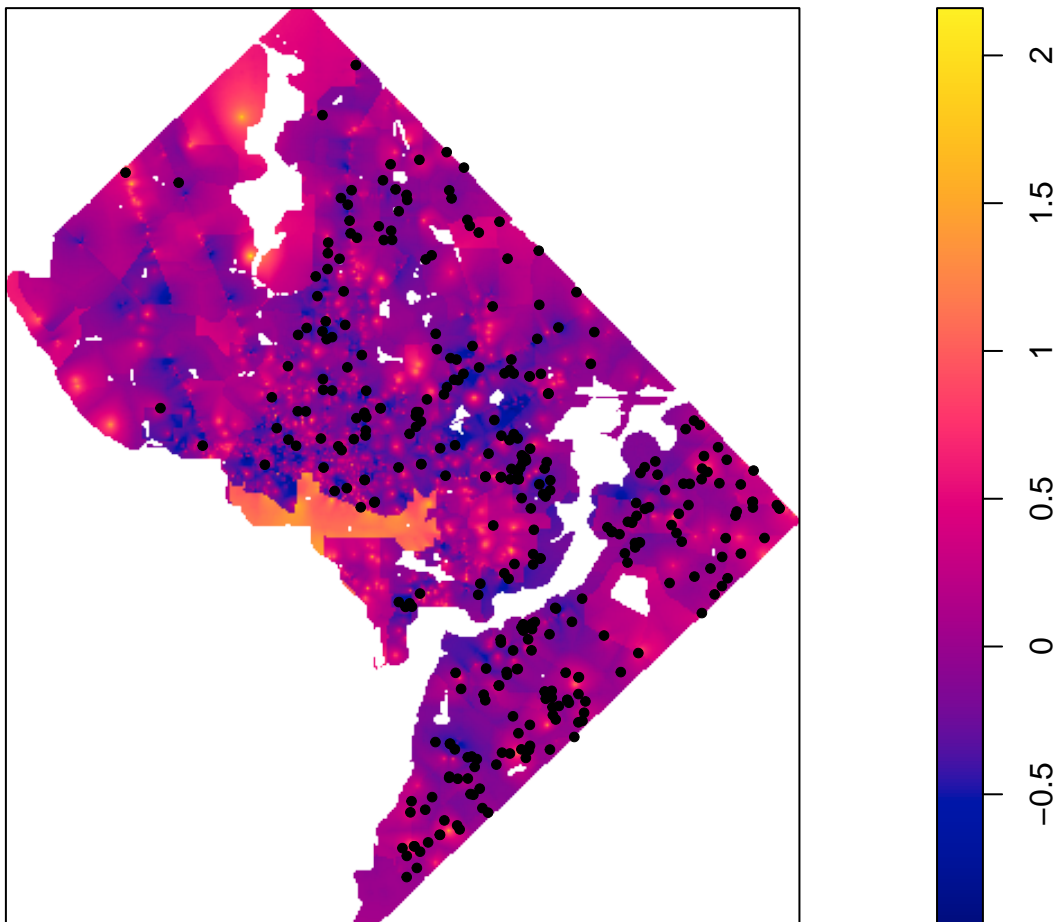

Supplement: Supplementary file 5 [file 1]

**(e) Log of population density at block group level**

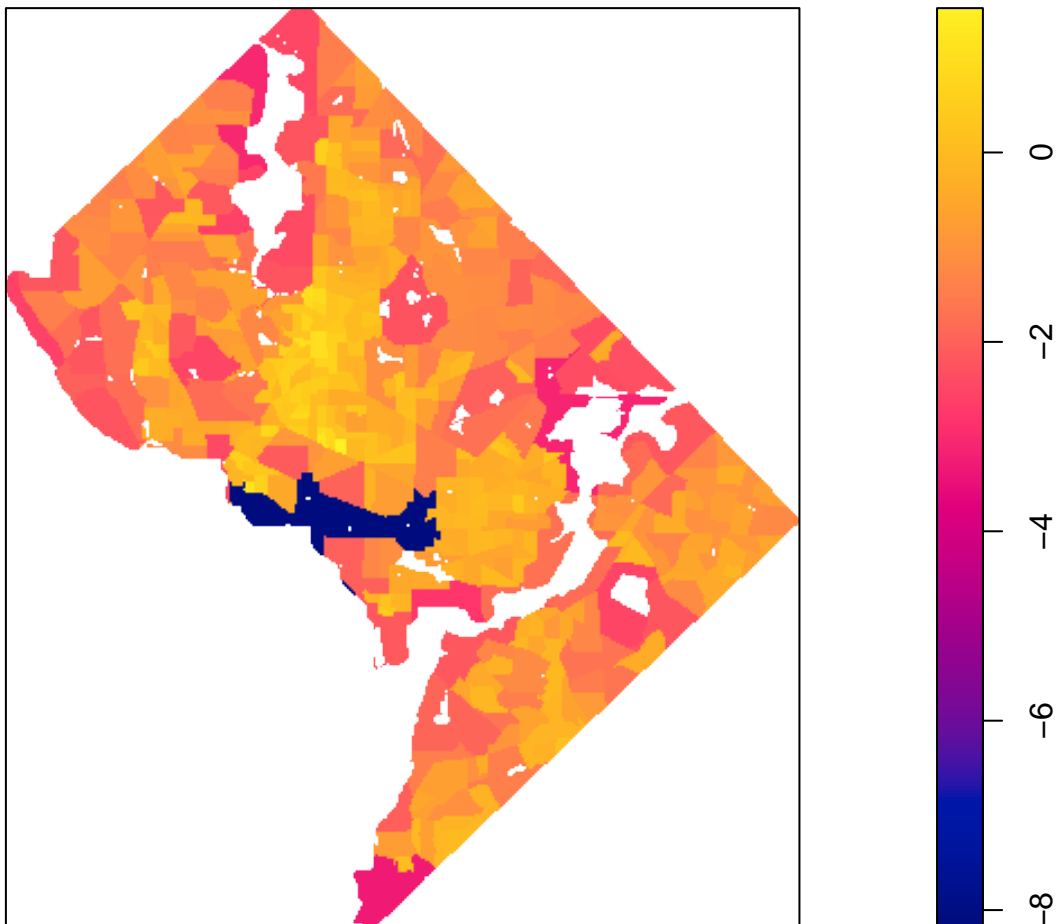

Supplement: Supplementary file 6 [file 1]

**(c) Estimated PCFs**

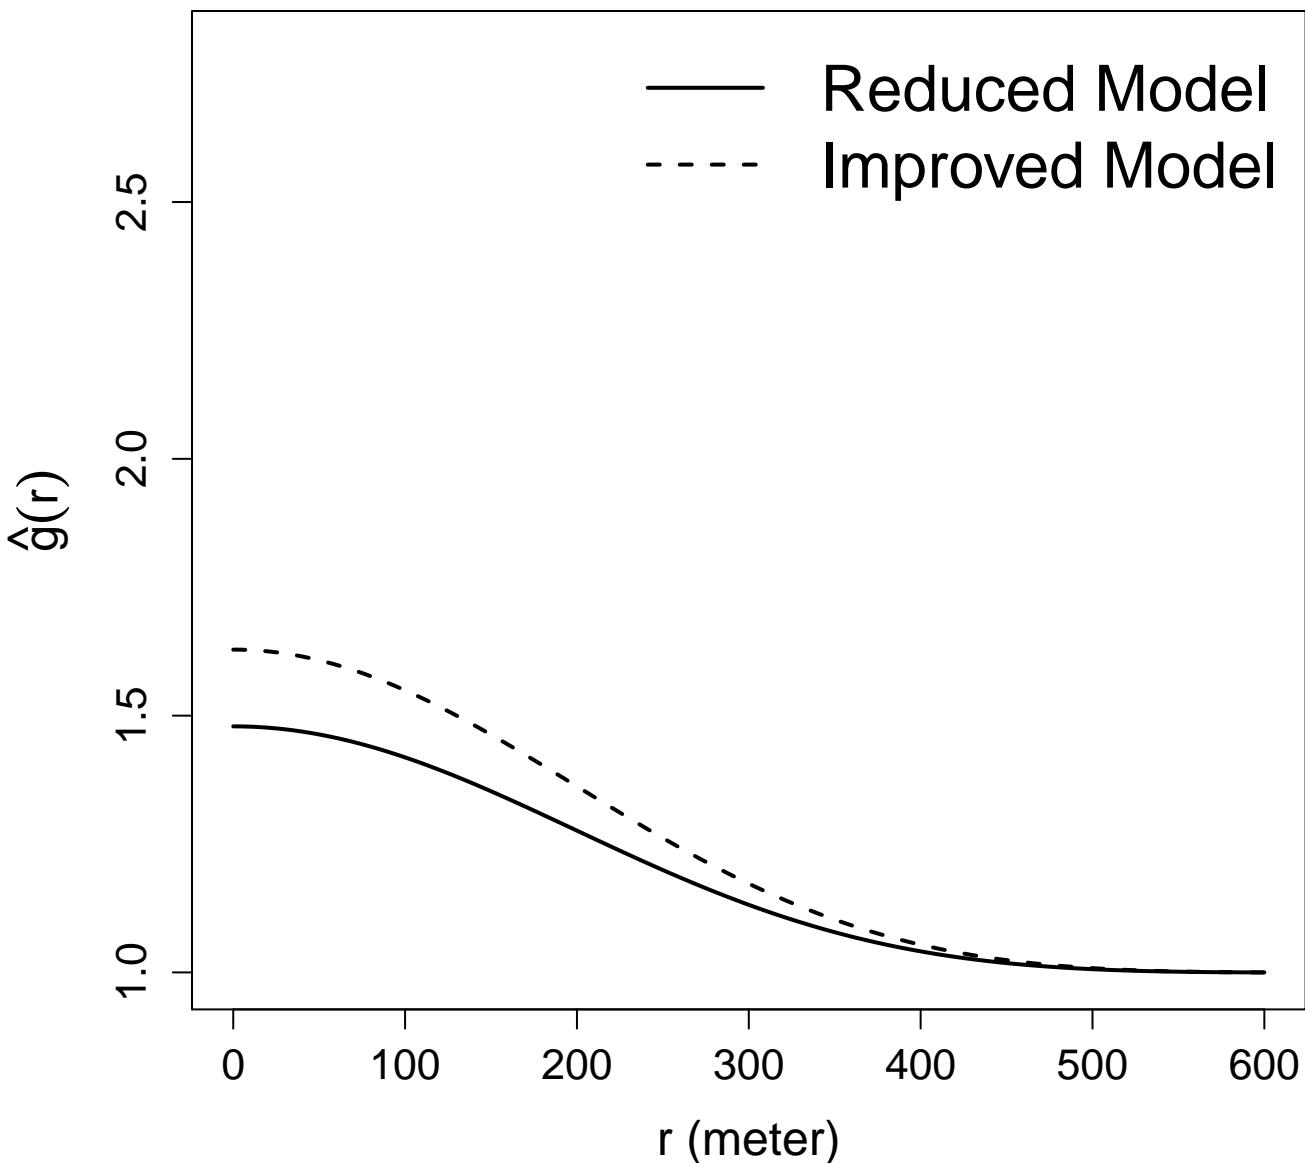

Supplement: Supplementary file 7 [file 1]

**(c) Estimated PCFs**

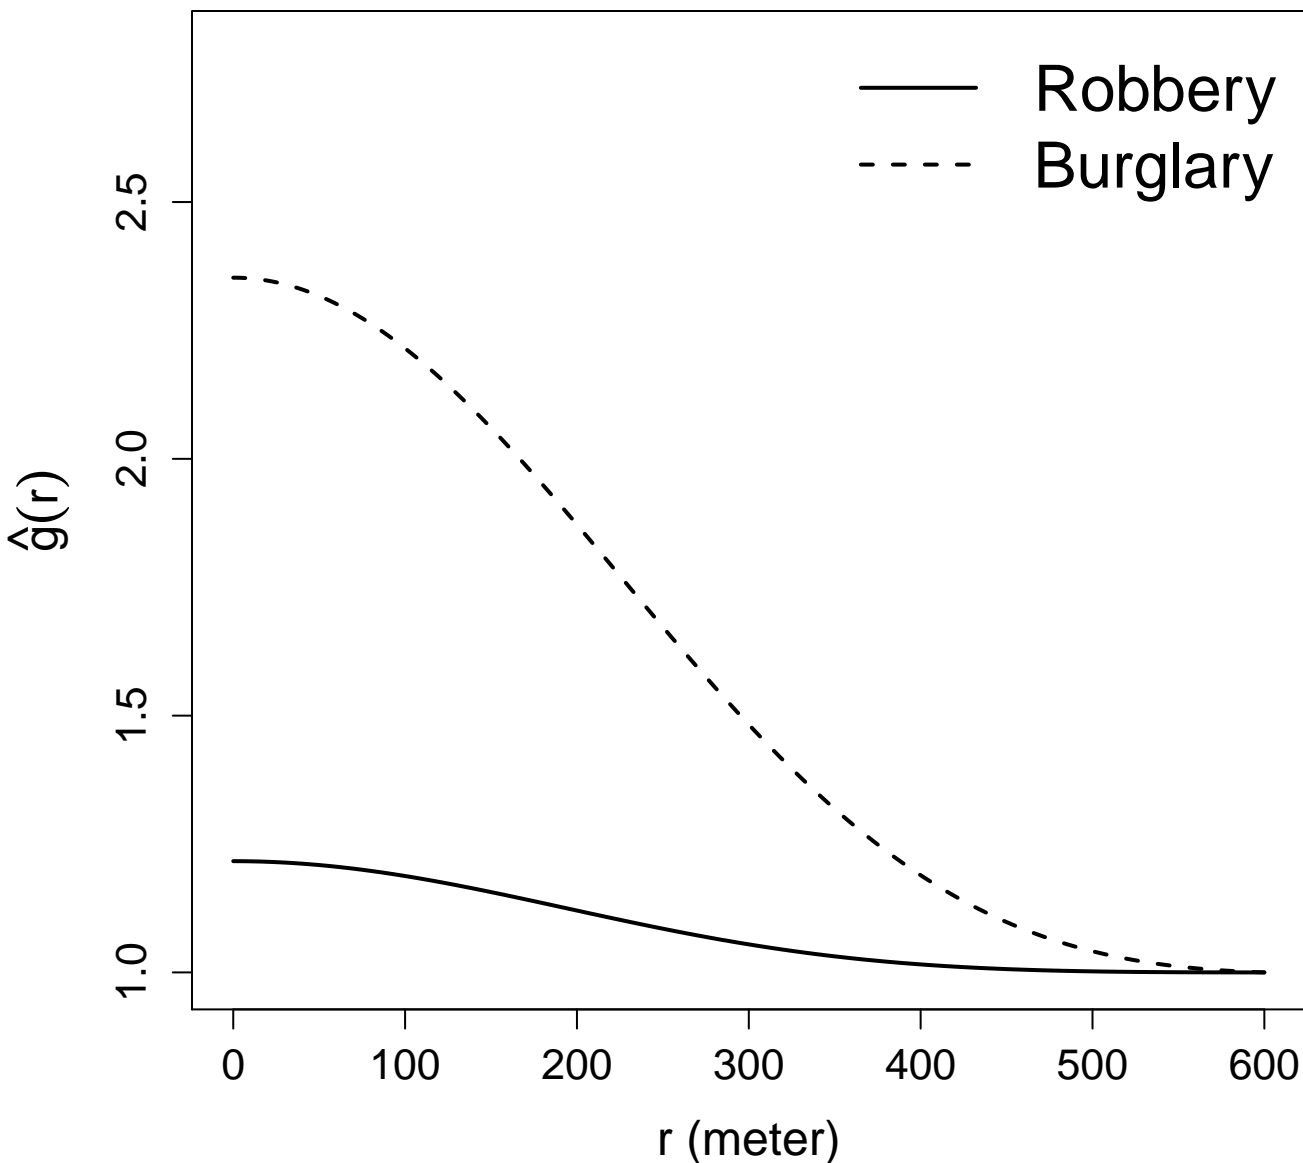

Supplement: Supplementary file 8 [file 1]

**(b) Estimated log-intensity (Burglary, Recuded Model)**

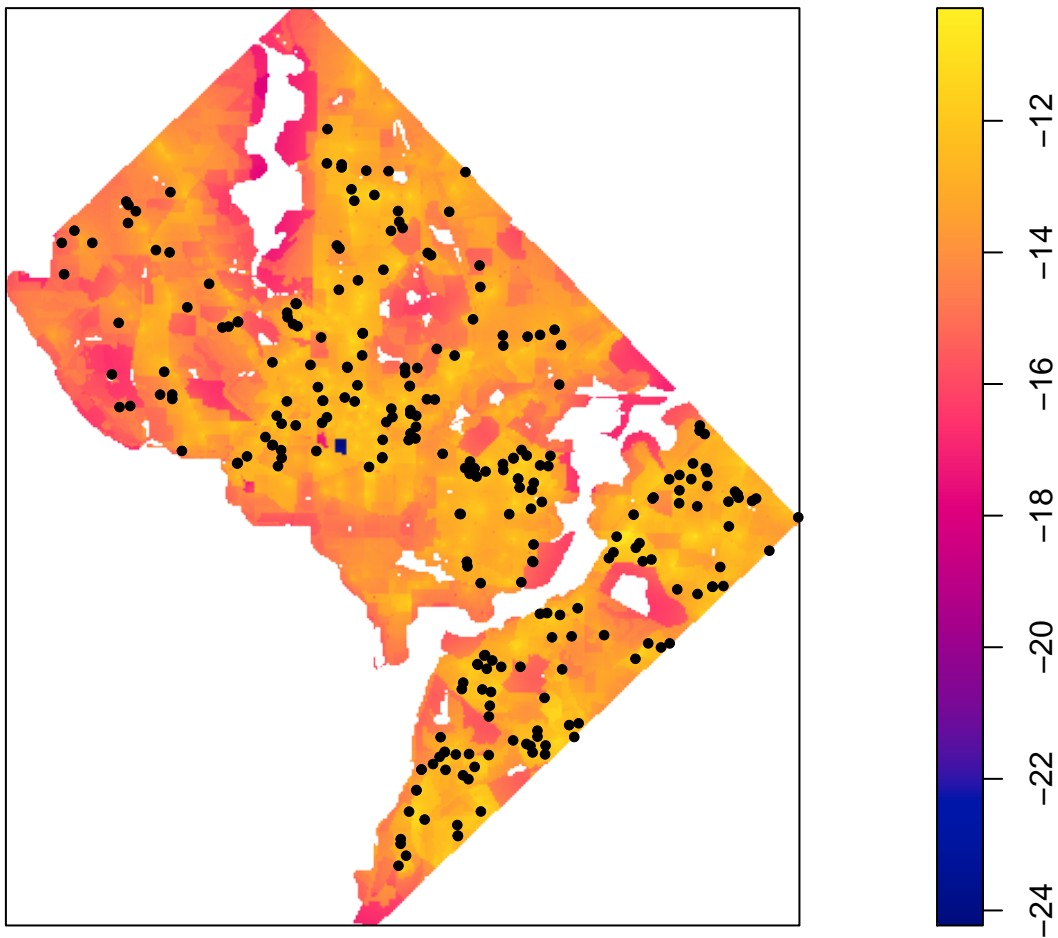

Supplement: Supplementary file 9 [file 1]

(d) Onpremisdist v.s. Robbery

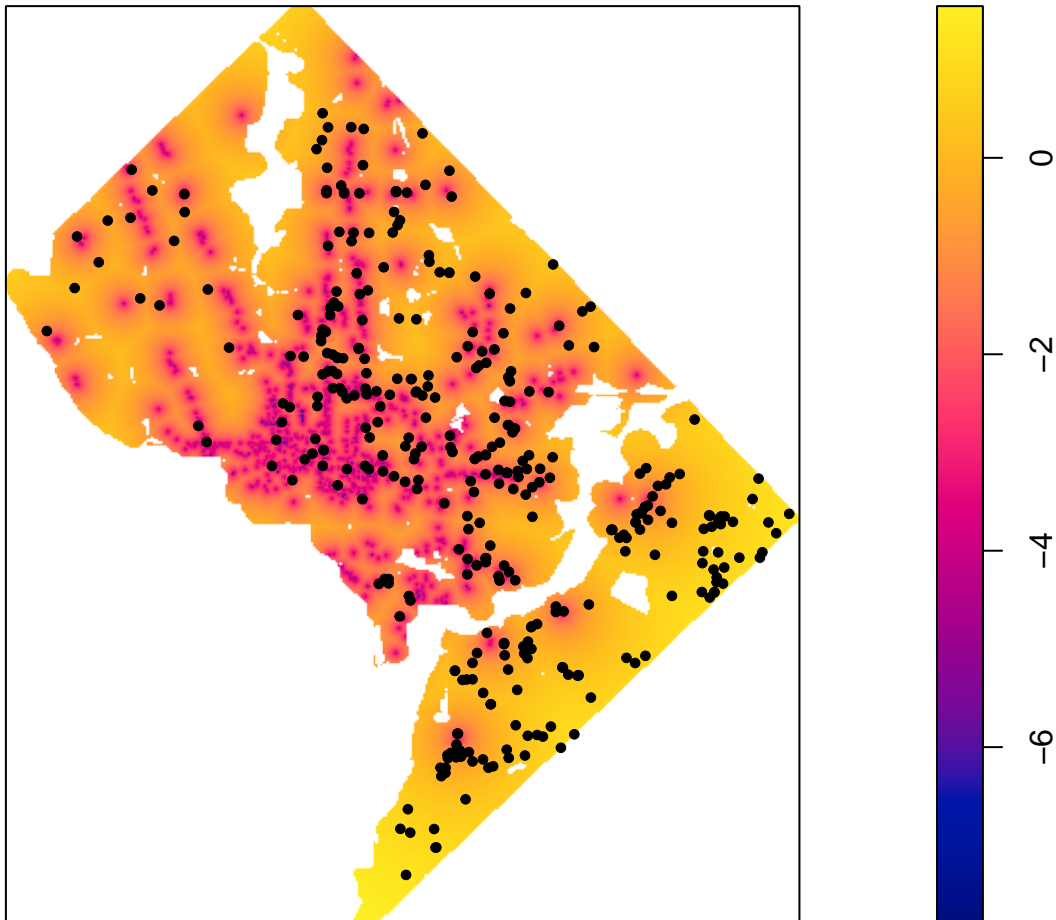

Supplement: Supplementary file 10 [file 1]

**(b) Log of distance to the nearest grocery/convenient store**

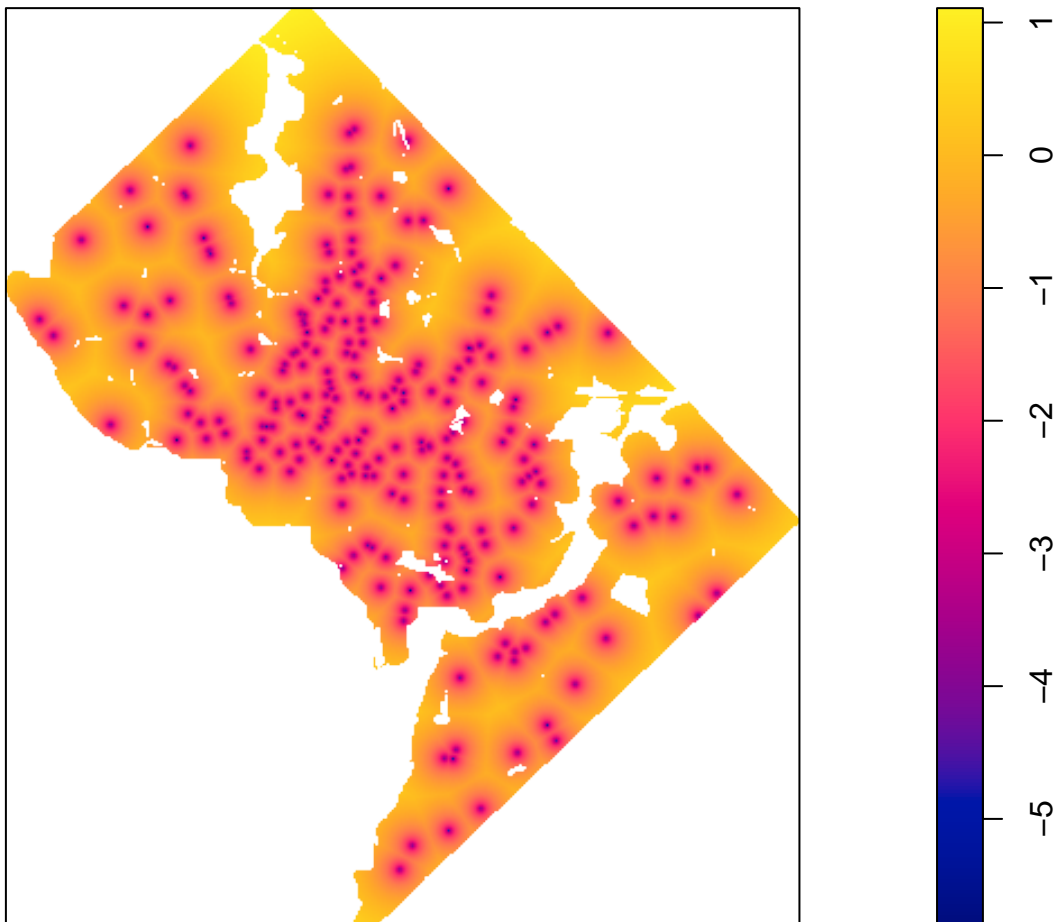

Supplement: Supplementary file 11 [file 1]

**(f) % of African American (census tract level)**

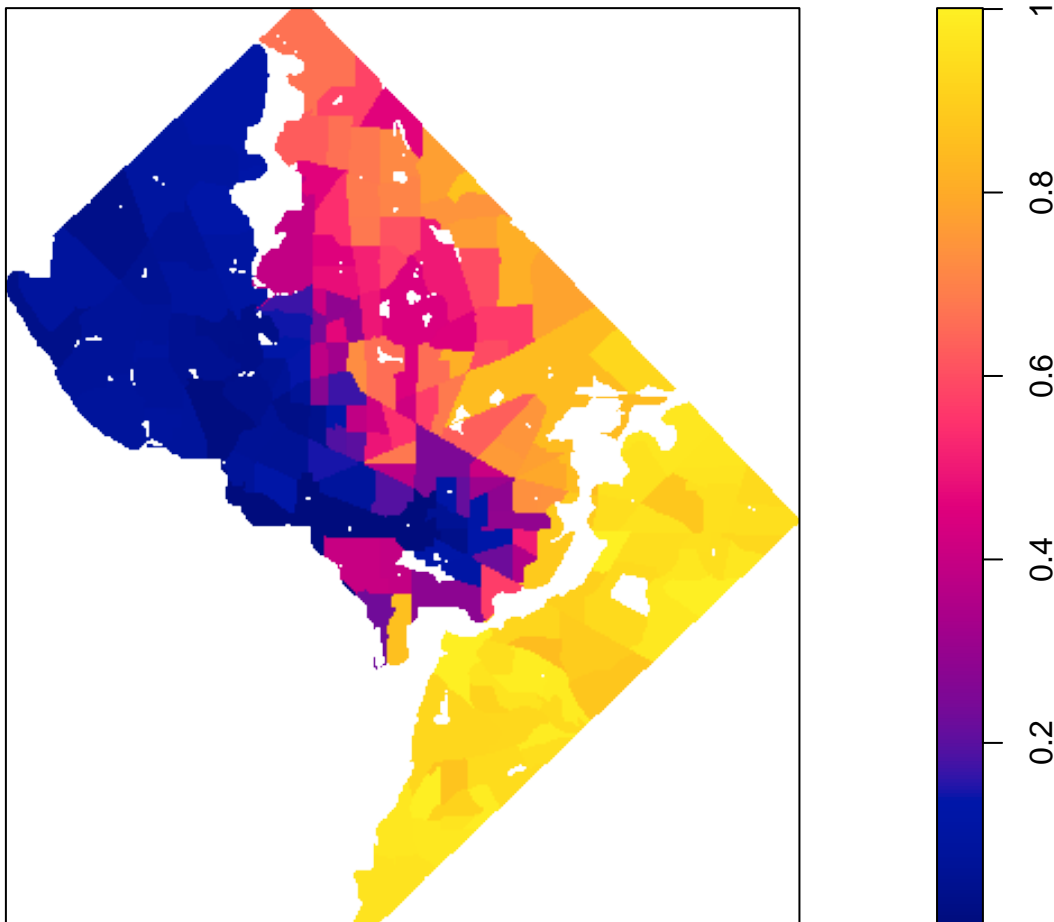

Supplement: Supplementary file 12 [file 1]

**(c) Log of distance to the nearest on-premise outlet**

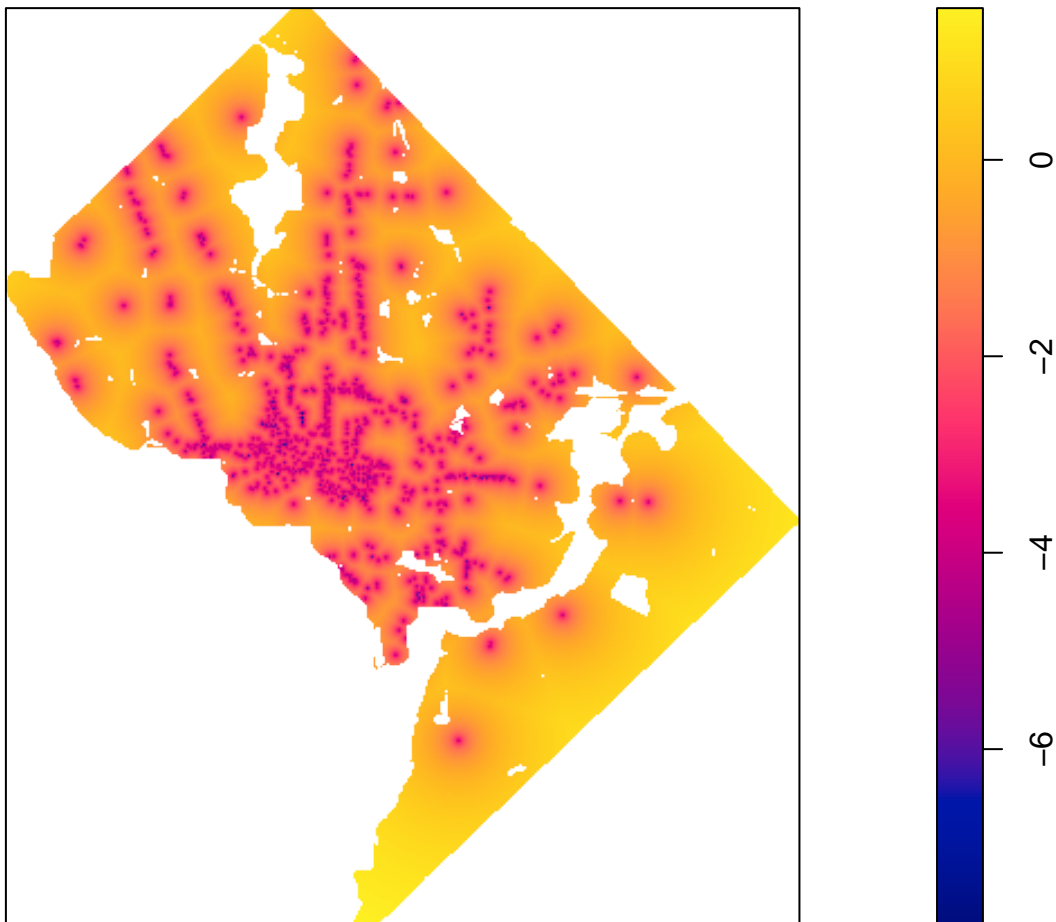

Supplement: Supplementary file 13 [file 1]

**(a) Log of distance to the nearest liquor store**

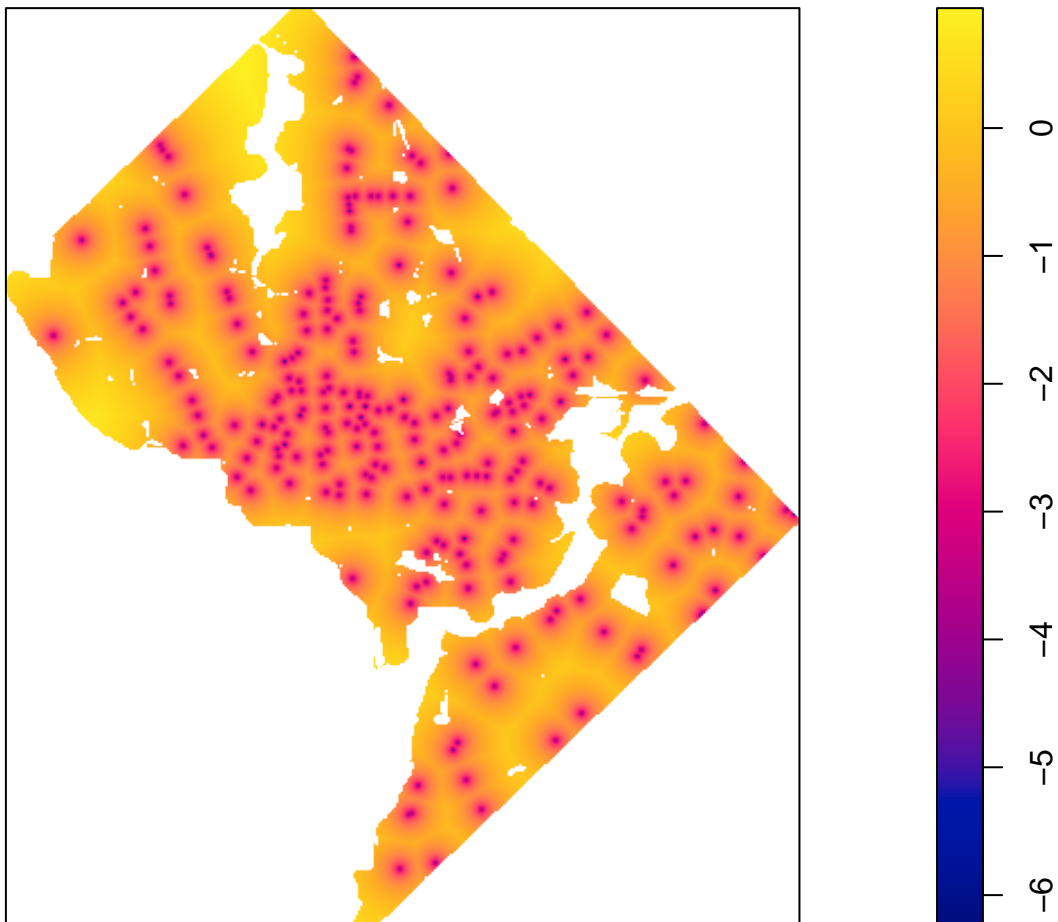

Supplement: Supplementary file 14 [file 1]

**(a) Estimated log-intensity (Assult, Improved Model)**

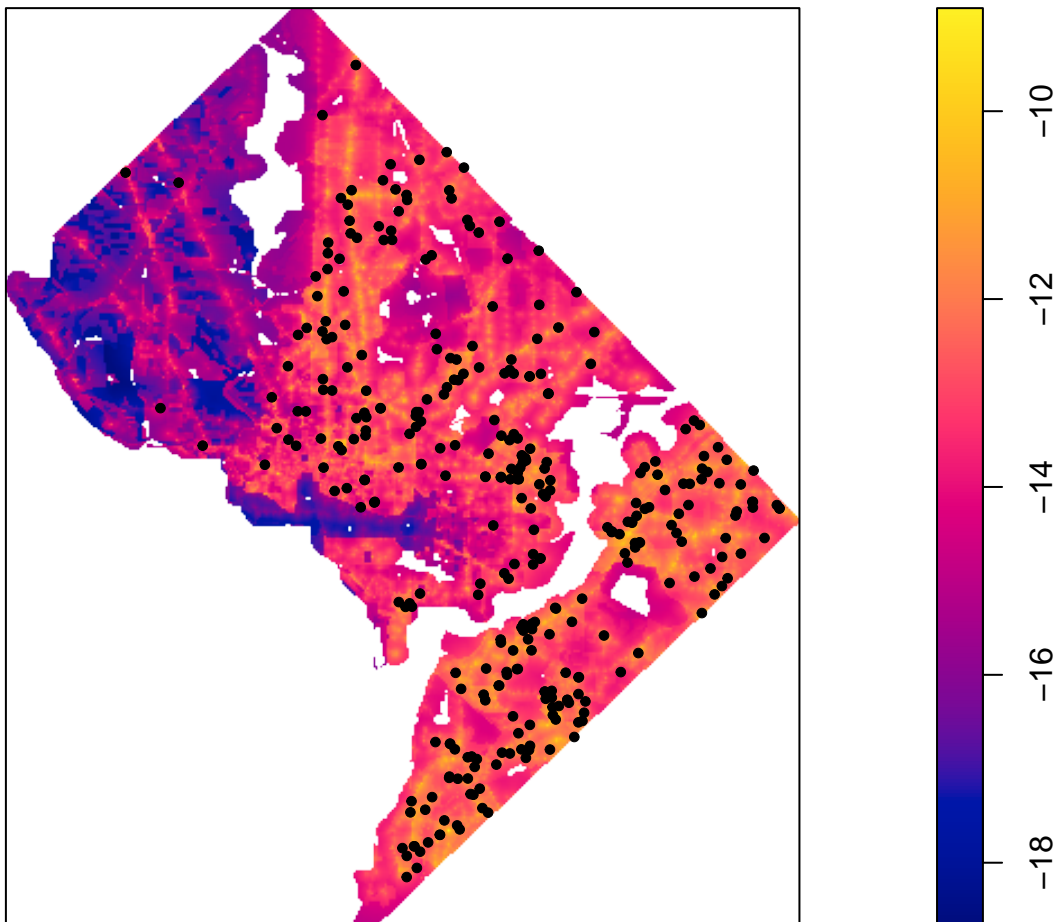

Supplement: Supplementary file 15 [file 1]

**(a) Estimated log-intensity (Robbery, Recuded Model)**

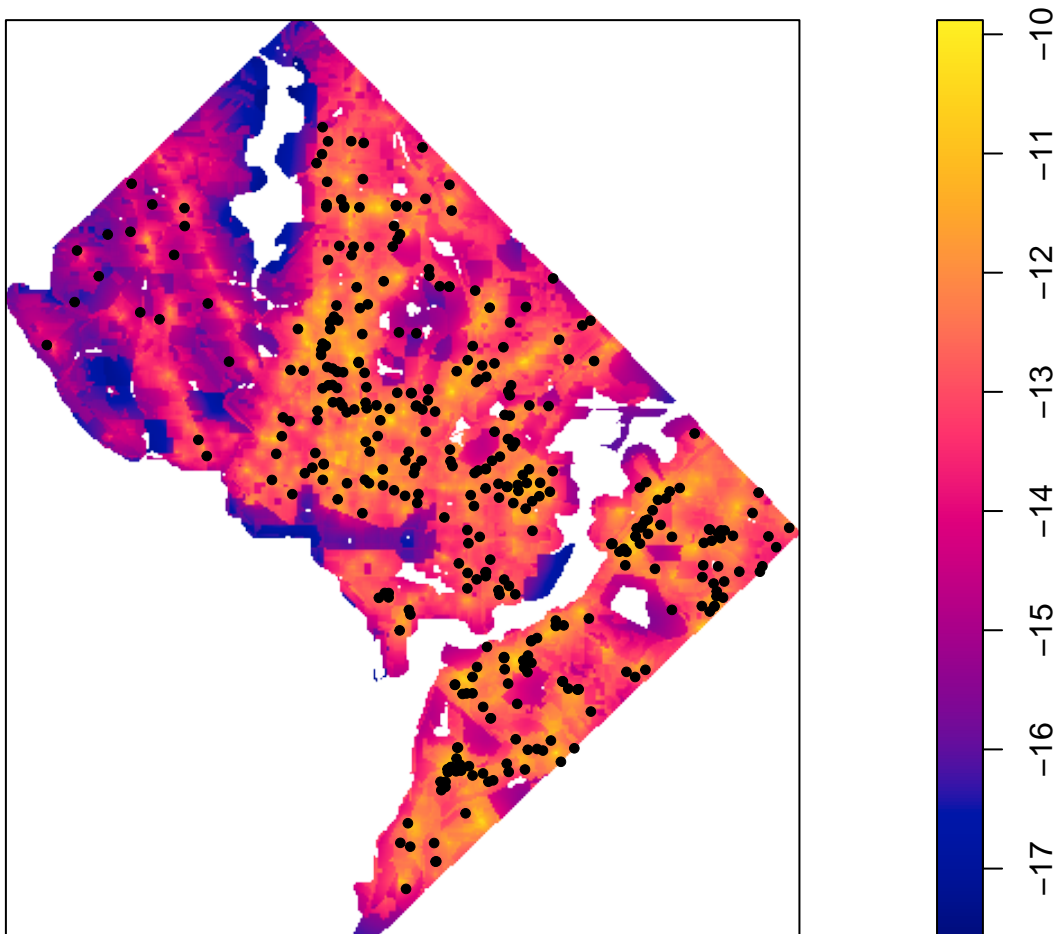

Supplement: Supplementary file 16 [file 1]
